# Supplementary material
Source: publisher figshare collection journal article supplement (https://rs.figshare.com/ndownloader/files/13198706)
Supplement: Supplementary file 1 [file 13198706]

**SUPPLEMENTARY MATERIALS**

**Appendix S1. Literature Review**

We reviewed studies that used museum collections to document morphological changes associated with climate change (Table 1 and S1). We focused on animals, as phenotypic changes in plants have been extensively documented elsewhere [see 1]. The majority of studies were located by searching Web of Science during February 2018 for the keywords sets: “museum climate change morphology” and “museum climate change coloration”, but we also included other relevant studies we were aware of. We only included studies that met at least one of the following criteria: introduced their research using explicit climate-related hypotheses, considered temperature and/or precipitation in statistical models of change, or interpreted their results in the context of climate change. Given the extensive past reviews of body size change [2,3], we only included size if it was measured in addition to other morphological traits.

We identified 16 studies that met our criteria. Most of the studies considered either coloration (Table 1) or cranial morphology, with a few studies of body shape (studies of traits other than coloration are in Table S1). Most studies considered vertebrates (primarily rodents and birds), with some additional studies of insects and mollusks. Both taxonomic and geographic breadth varied considerably between studies. Taxonomic diversity ranged from single species to as many as 28 spanning an entire order. Geographic areas ranged from a ~50km2 plot to global. The geographic distribution of studies was biased toward Europe and the United States. Most studies examined direct responses to shifts in temperature and precipitation, but some responses were indirect such as responses to climate-induced range shifts. Some studies additionally considered responses to landscape and habitat changes.

Studies of cranial morphology or overall body shape rarely made explicit hypotheses regarding the effects of climate change. In particular, none of the five studies of rodent cranial morphology had specific predictions. Only one study of a trait other than coloration included an *a priori* prediction that was confirmed. Although cranial morphology and body shape often varied considerably over time, the direct effect of climate was often weak or inconsistent. Changes were often associated with habitat changes (indicated by factors such as urbanization, human population density, and measures of vegetation type) or the consequences of climate-associated range shifts (increased interspecific competition or diet shifts).

On the other hand, studies of coloration consistently made predictive hypotheses. For invertebrates, reductions in melanin or other dark pigments were consistently predicted due to the role of color in thermoregulation [4]. The studies of bird coloration (both owls) had more complex predictions based either on geographic temperature-color associations or changes in snow cover. These hypotheses were mostly confirmed in all but one study (of continuous color variation with known potential for both genetic and plastic variation [5]). Notably, all of the studies which found the predicted change were of discrete color morphs with a known genetic basis (established by non-collection-based research either prior to or as part of the study).

The use of natural history collections alone can demonstrate morphological changes over time, but fully understanding the causes of these changes and their relationship to climate change requires considerable additional ecological and genetic knowledge. Distinguishing the relative contributions of phenotypic plasticity and genetic evolution requires knowledge of the genetics underlying the trait. The only studies we identified where the observed morphological change could be specifically attributed to evolution were studies of color polymorphisms whose genetic basis was established separately. Studies of quantitative traits had much more difficulty attributing the change to plastic or genetic factors, and many papers did not even attempt to make this distinction. For future studies, the ability to extract DNA from museum specimens offers promise of detailed phenotypic tracking via linking genotypes to phenotypes [1].

While some of the studies we found rely on collections alone, there are advantages to pairing them with recent collections. The studies we considered generally used one of two different methodologies: a within-collection survey or resampling a historical survey. By considering many different times, within-collection surveys allow detection of potentially complex, non-linear changes in morphology and testing the influences of temperature versus other changes. However, they are limited by extant samples, which may not include recent time periods and can suffer sampling biases and unknown methodology. Studies resampling historical surveys took advantage of a specific prior survey and resampled specimens at the same site (typically with the same methods). Resampling studies require additional effort and are limited to taxa and regions where past surveys were undertaken, but allow comparison of samples collected using consistent methodology, reducing sampling bias. Our *Colias* focal study employed both approaches: specimens for regions 2 and 3 were exclusively derived from collections, whereas specimens for region 1 were supplemented by field collections.

With the exception of size, morphological traits related to climate change are understudied in natural history collections. What studies do exist show strong bias in taxa, habitats, geographic region, and traits considered. These biases may exist in part due to the biases of past collections and the constraints inherent in preserving specimens. Nevertheless, studies of new geographic regions and habitats, particularly the tropics and aquatic or marine environments; new taxa, particularly ectothermic vertebrates; and new types of traits seem promising.

**Appendix S2. Supplementary Methods**

***(a) Trait measurements***

We processed specimens from museums in the United States with the largest holdings of *C.* *m. meadii* from Colorado (the Yale Peabody and the McGuire Center for Lepidoptera and Biodiversity); museums located in Colorado (the C.P. Gillette Museum of Arthropod Diversity at Colorado State University and the University of Colorado Museum); and museums with holdings from time periods absent from other museums (the Smithsonian Museum of Natural History, the Milwaukee Public Museum, and the California Academy of Science). Additionally, we were able to locate samples from one private collector via the Yale Lepidoptera list serve.

Because the collections contained relatively few females, especially in more recent years, we restricted our analyses to males. While females tend to have darker wings than males, elevation clines in melanism are similar between the sexes [6]. Model predictions for temporal trends in melanism are based on the temperature dependence of flight time and egg viability, which were translated into female reproduction [7,8]. The flight time constraints should influence male fitness similarly, so predicted temporal trends also apply to males. The similar elevation clines between sexes suggest that they respond to climatic gradients similarly and our observations should be indicative of both sexes.

All specimens for the *C. meadii* range were included except two specimens with a collection date of 170 (June 19, collected at Como, Colorado 39.31°N and 105.89°W in 1984, McGuire Center collection) and 171 (June 20, collected at Los Pinos Pass, Colorado 38.1°N and 106.97°W in 1967, Yale Peabody collection), because they strongly influenced regressions and the date was more than two standard deviations below the regional mean (mean+sd= 208.4+13.65). Including these specimens increased the slope of our regressions and significance of our results.

Pinned specimens were measured by removing labels, transcribing the locality data, and inverting the specimen to expose the ventral hindwing (the wing region accounting for the majority of absorption for this ventral basking species). Elevation was recorded from the locality tag in the collections if available; otherwise we used a digital elevation model to estimate elevation based on latitude and longitude. We used Google Earth to georeference locality descriptions when necessary.

A digital micrometer was used to measure the forewing of the specimen from the thoracic insertion to the apex of the wing. The specimen was then photographed through a 100-mm macro lens in RAW format with a Canon Rebel XSi mounted on a copy-stand. Each image included a black and white standard. Because the height of the animal on the pin was variable, we used auto focusing to allow for the clearest image. We measured setal length on the ventral thorax with an ocular micrometer on a Wild M5 microscope as the longest setae between the first and second leg. All measurements were taken by MacLean and specimens were prepared for measurements in groups of five to obscure each specimen’s metadata during measurements. Specimens were distributed randomly throughout collection boxes and thus were measured randomly within each collection.

Using the images, we assessed the degree of wing melanism on the posterior ventral hind-wing. First, we selected a triangulated region between the eyespot, hind wing insertion, and the wing margin [6,9]. Using a MatLab program (T. Hedrick, unpublished), we then converted the RAW image to black and white to account for potential fading. Black and white is appropriate because wing scales are pigmented by either melanin (dark) or pterin (light). We digitized the region of interest and the black and white standards for each sample, and then used the standards to calculate a standardized gray-level value between 0 (white) and 1 (black). The gray-level value should be robust to butterfly size because it represents the proportion of melanic wing scales. In order to verify our measure of gray-level as a proxy for absorptivity, samples collected in the field 2012 and 2013 were photographed, and the absorption spectrum was measured from 350-1050 nm in a spectroreflectometer with an optical integrating sphere (FieldSpecPro FEFR 7501, ASD Inc) for the same wing region. Previous studies used absorption at 650nm as a measure of melanism and solar absorptivity for *Colias* wings [10,11]. Gray level and absorption at 650nm were highly correlated (n= 60, R2 = 0.78), confirming that gray level is an appropriate measure of solar absorptivity.

***(c) Data Analysis***

We restricted our analysis to specimens collected during or after 1953 due to the sparsity of earlier specimens and lack of climate data. We account for uneven collection intensities by restricting our analysis to 15 individuals per site per year. We randomly sampled specimens each of the 50 times we repeated the analysis. Statistical model results were similar across iterations of the analysis, so we report results averaged across the 50 iterations.

To account for trait similarity due to geographic proximity, we used maximum-likelihood spatial autoregressive (SAR) models [12,13]. We selected a SAR error model over a lag or mixed model following assessment using a Moran’s I test on the residuals of linear models as well as a Lagrange multiplier specification test. We used Moran’s I tests, estimates of model performance, and spatial correlograms to select a 40km threshold distance when developing spatial neighborhoods based on latitude and longitude. Neighbors were weighted using row standardization. We used a Moran’s I test on the model residuals to confirm that the SAR models fully accounted for spatial autocorrelation in the data [13]. We compared the SAR model output to linear models and found no qualitative differences in the direction of the effects.

**Appendix S3. Specimen data**

Data is currently available in an uploaded CSV file, but will be deposited in Dryad upon publication.

Column information:

**Collection:**

This column identifies the collection that houses that specimen. The abbreviations are as follows:

CalAc- the California Academy of Sciences

CSU- Colorado State Univeristy

CUB- University of Colorado at Boulder

hjm- Heidi J. MacLean field collections

JS- James Scott private collector

MW- Milwaukee Public Museum

UF- McGuire Center at the University of Florida

Yale- Yale Peabody Collection

**State:**

State where the specimen was collected according to the collector (and recorded on the museum label)

**County:**

Country were the specimen was collected according to the collector. If a county was not listed, the location information was used to identify the county (as it was at the time of the collection).

**Location:**

This specific collection location according to the collector. This information was used to identify latitude and longitude if not recorded by the collector.

**Lat.decimaldegree:**

This is the latitude in decimal degrees according to the collector and listed on the label or georeferenced based on the “Location” information

**Long.decimaldegree:**

This is the longitude in decimal degrees according to the collector and listed on the label or georeferenced based on the “Location” information

**Elevation_m:**

Elevation (m) according to the collector or estimated from georeferencing the “Location” information.

**Month, Day, Year:** of collection as recorded on the museum label

**Sex:** of the specimen determined morphologically indicating male (M) or female (F)

**FWL_mm**: forewing length in mm measured from the tip of the forewing to the insertion point on the thorax using a digital micrometer.

**Thorax_mm:** setal length in mm on the ventral thorax measured with ocular micrometer on a Wild M5 microscope as the longest setae between the first and second leg and then converted into mm.

**GrayLevel_propblack:** proportional gray level calculated for a triangulated region between the eyespot, hindwing insertion, and lower wing margin (see supplement for details).

Table S1. Synthesis of previous studies using natural history collections to assess morphological traits. We include the predicted and observed responses to climate change and whether they concur. See table 1 for shifts in coloration.

| **Specific traits** | **Taxa** | **Method** | **Time Range** | **Region** | **Changes considered** | **Predicted response to climate change** | **Results summary** | **Predicted response to climate detected?** | **Source(s)** |
| --- | --- | --- | --- | --- | --- | --- | --- | --- | --- |
| **CRANIAL MORPHOLOGY** |  |  |  |  |  |  |  |  |  |
| cranial morphology | *Peromyscus leucopus, P. maniculatus* (Mammalia: Rodentia) | resampling | 1959-1967 vs 2007-2011 | Southern Quebec, Canada | climate associated range shift, character displacement | No prediction | divergence in skull morphology between species with some additional parallel changes; no change in size | - | [14] |
| cranial morphology, body size | *Peromyscus maniculatus* (Mammalia: Rodentia) | resampling | 1911-1920 vs 2003-2012 | California, USA | temperature, precipitation | No prediction | skull morphology change over time varied spatially, small influence of climate. Little change in size | - | [15] |
| cranial morphology | *Tamias* *alpinus, T. speciosus* (Mammalia: Rodentia) | resampling | 1911-1920 vs 2003-2012 | California, USA | temperature1, precipitation, range shift | No prediction | skull morphology change in *Tamias alpinus*; but considerable variation overall | - | [16] |
| integration of cranial morphology | *Tamias* *alpinus, T. speciosus* (Mammalia: Rodentia) | resampling | 1911-1920 vs 2003-2012 | California, USA | temperature1, precipitation, range shift | No prediction | stronger directional selection and increased trait covariation in *Tamias alpinus* | - | [17] |
| cranial morphology, body size | Rodentia, 28 species (Mammalia) | collection survey | pre- vs post- 1950 | Global | temperature, precipitation, human population density | No prediction | wide variation among traits, typically associated with human population density or precipitation change | - | [18] |
| cranial morphology, body size | *Pipistrellus kuhlii* (Mammalia: Chiroptera) | collection survey | 1875 to 2007 | Italy | temperature, urbanization | decreased body size to dissipate heat, or increased body size to conserve water | increased cranial size over time, no change in body size; associated with increased artificial lighting | No | [19] |
| bill morphology | *Junco hyemalis* (Aves: Passeriformes) | collection survey | 1905 to 1980 | California, USA | temperature, precipitation, habitat type | Increased bill surface area to dissipate heat | no effect of temperature on surface area but weak effect on bill dimensions; effect of habitat on surface area | No | [20] |
| bill morphology | Psittaciformes, 5 species (Aves) | collection survey | 1871 to 2008 | Australia | temperature | Increased bill surface area to dissipate heat | increase in bill surface area with temperature in 4 of 5 species | Yes | [21] |
|  |
| **BODY SHAPE** |  |  |  |  |  |  |  |  |  |
| width/length ratio, body size | *Gyretes sinuatus* (Insecta: Coleoptera) | collection survey | 1928 to 1988 | South-central USA | temperature2 | No prediction | larger but narrower body over time | - | [22] |
| wing shape | *Arctia caja* (Insecta: Lepidoptera) | mixed3 | 1909-1971 vs 2002 | UK | climate-associated range shift, habitat fragmentation | No prediction | both wings narrower and hindwings longer with time, traits associated with improved dispersal ability | - | [23] |
| wing shape, body size | 11 species, Aves | collection survey | 1889 to 2010 | Southern Germany | temperature | Decreased body size | traits varied with time but differently among species and without association with temperature | No | [24] |

| 1Temperatures found to be constant over time range in the region considered by study |
| --- |
| 2Temperatures found to decline over time range in the region considered by study |
| 3Comparison of contemporary sampling project to general historical specimens. |


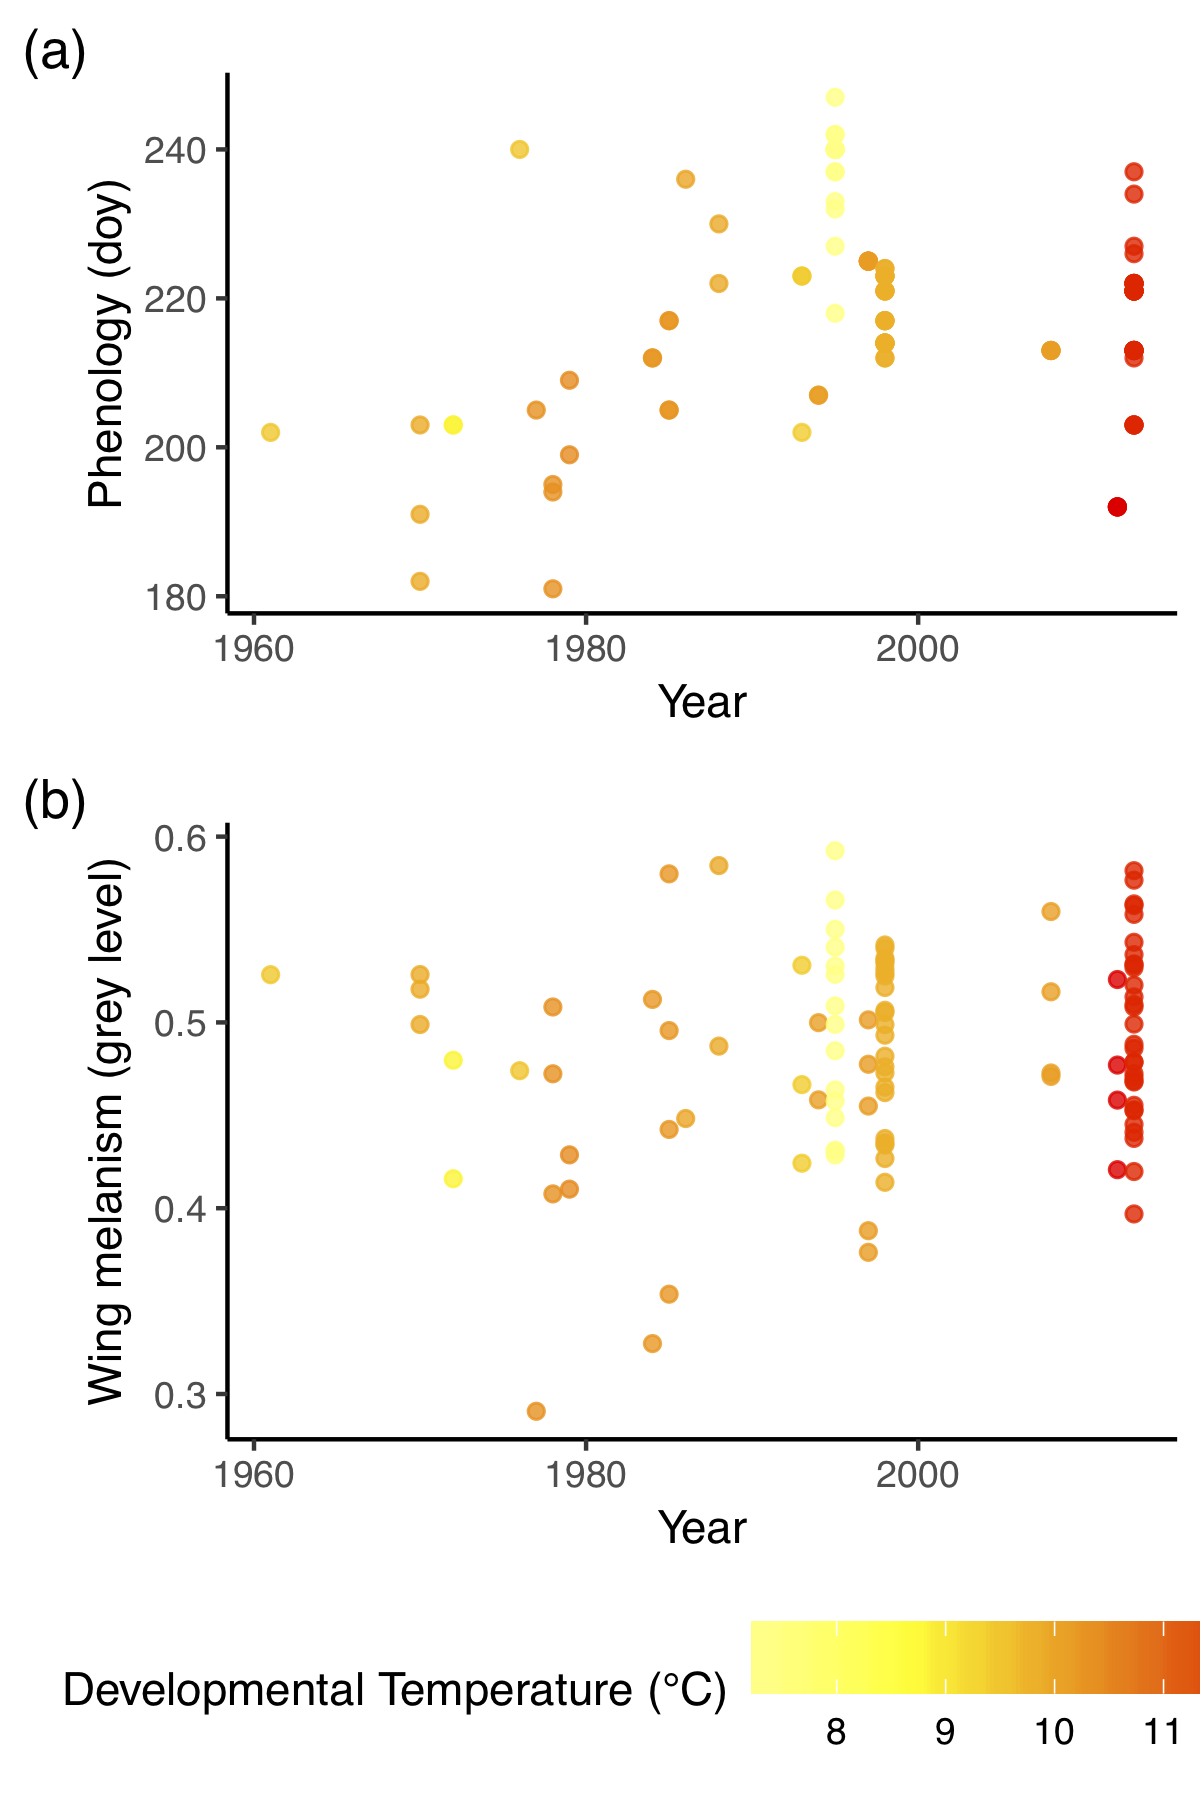


Figure S1. At Loveland Pass, CO, a) *C. meadii* phenology (doy: day of year) advances when developmental temperatures are warmer. B) Wing melanism (grey level) does not vary significantly as a function of pupal temperature. Wing melanism does not exhibit temporal shifts either without (top) or with (bottom) controlling for plasticity. Black lines depict significant (P<0.05) regressions estimated from a spatial model with bootstrapping.


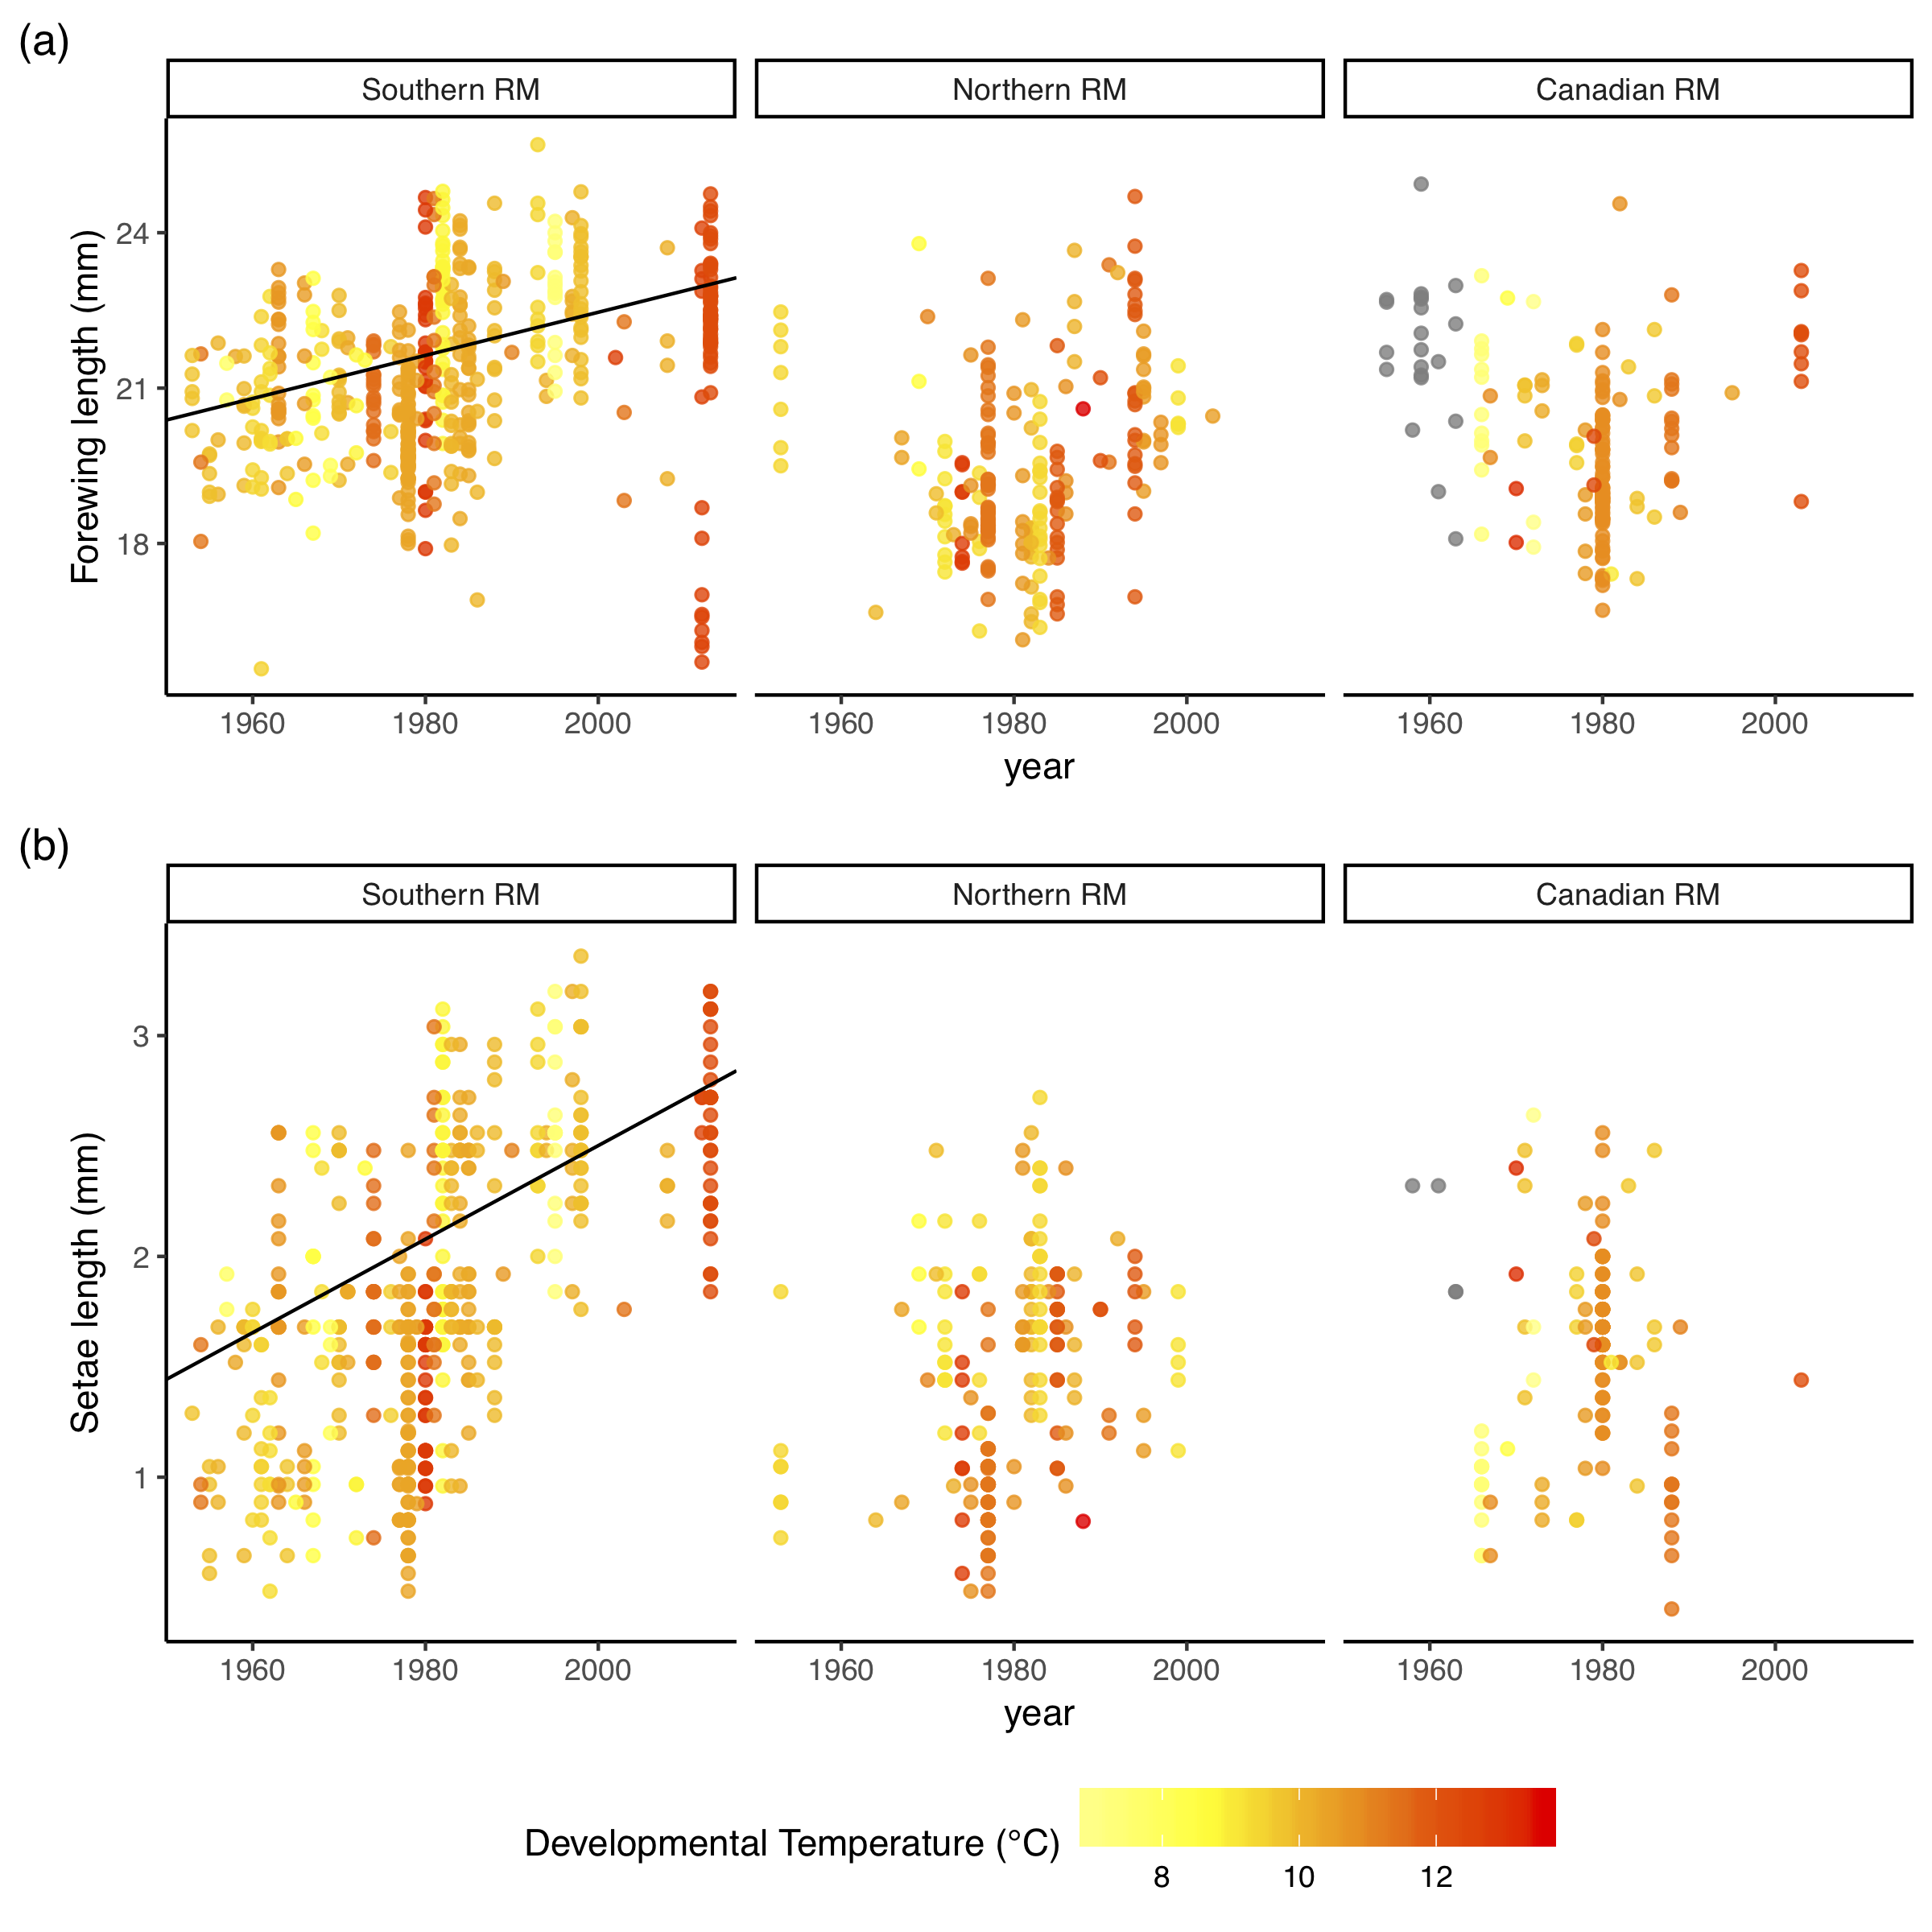


Figure S2. a) *C. meadii* forewing length (mm) and setae length (mm) increase across recent decades in the Southern Rockies. We do not detect significant phenotypic shifts in the Northern or Canadian Rockies. Black lines depict significant (P<0.05) regressions estimated from a spatial model with bootstrapping.


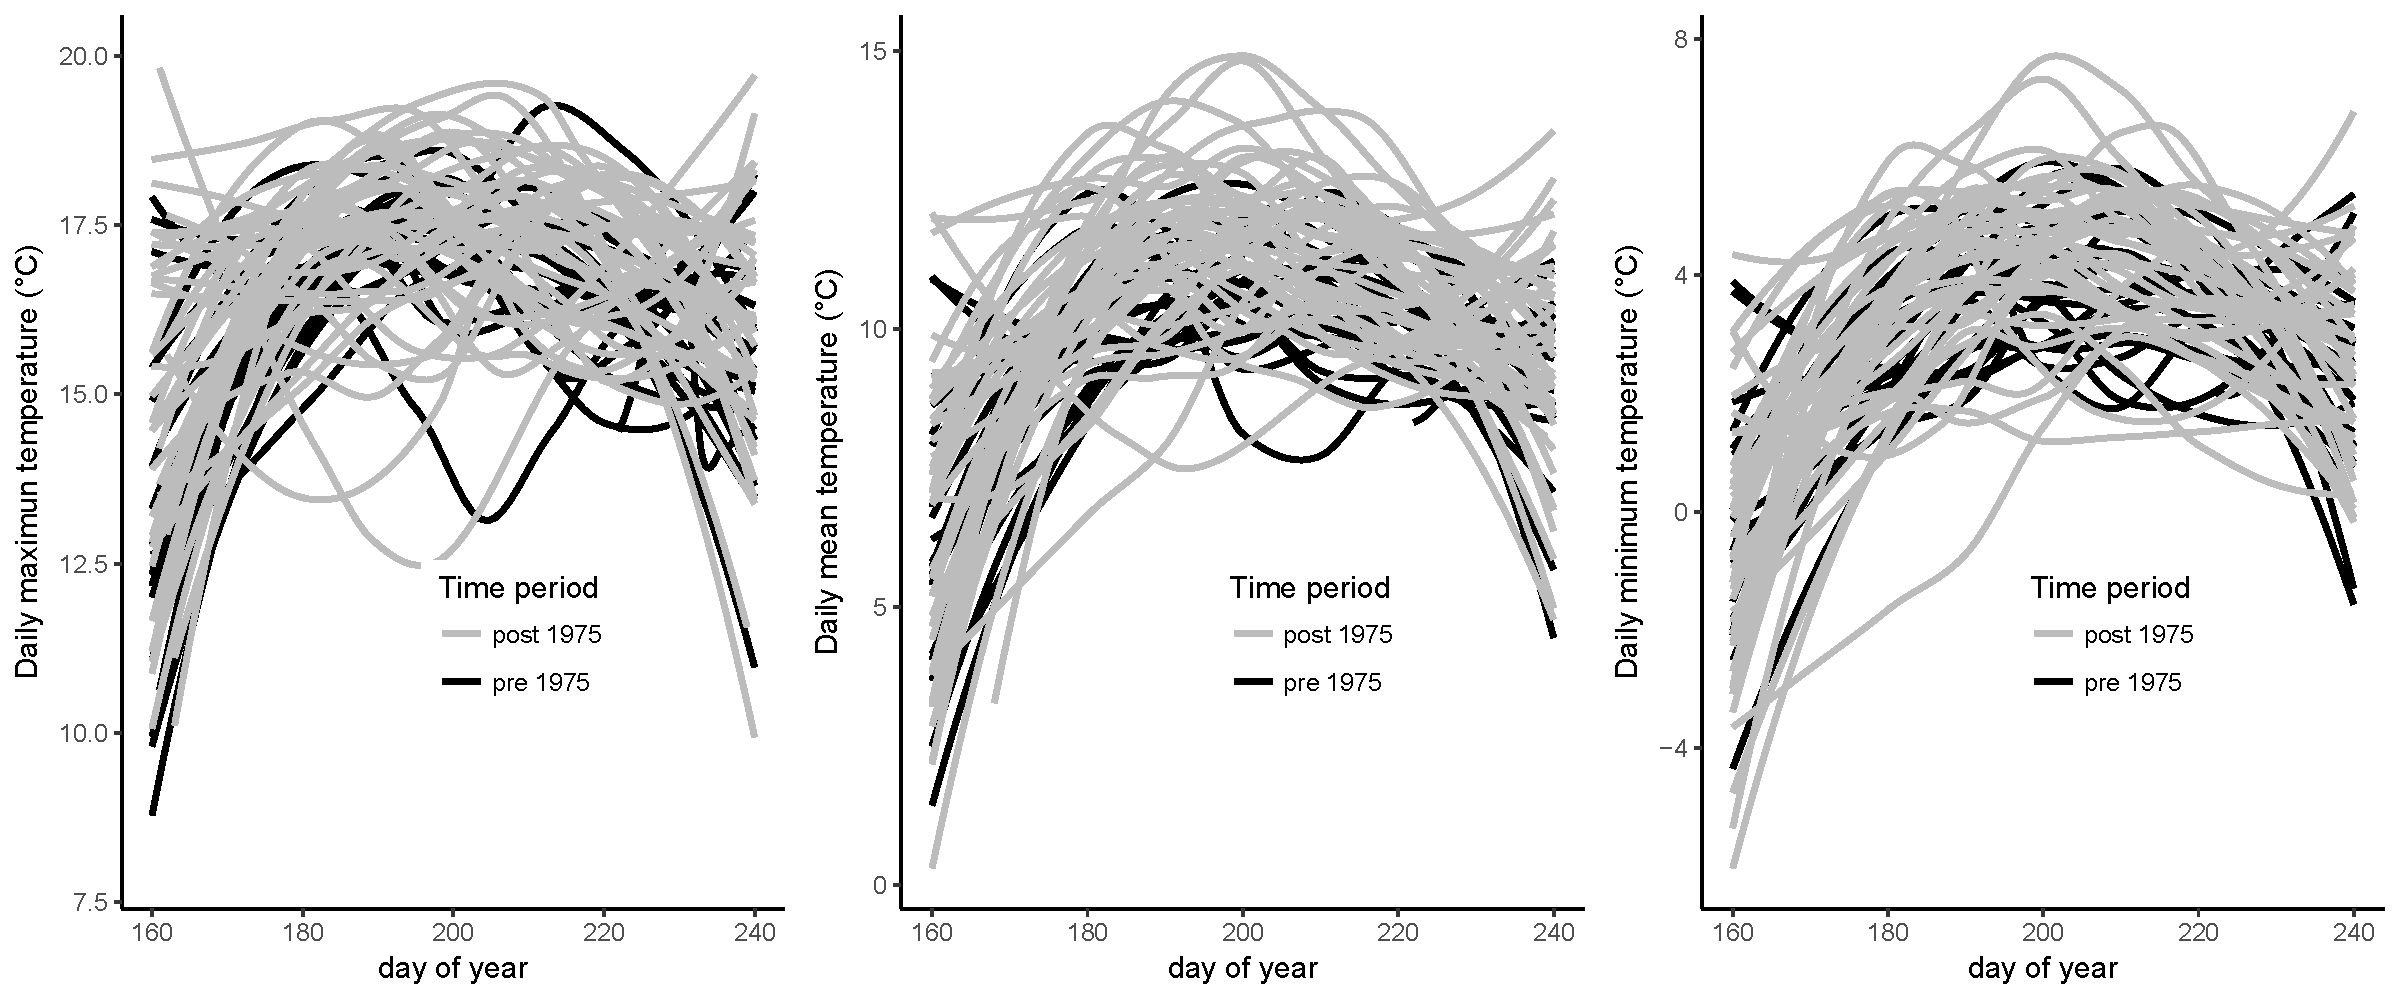


Figure S3. Seasonal temperature trends of daily maximum, mean, and minimum temperatures (left to right) in region 1 vary before (black) and after (gray) 1975. Each line corresponds to one year.

**References**

1. Holmes MW *et al.* 2016 Natural history collections as windows on evolutionary processes. *Mol. Ecol.* **25**, 864–881.

2. Gardner JL, Peters A, Kearney MR, Joseph L, Heinsohn R. 2011 Declining body size: a third universal response to warming? *Trends Ecol. Evol.* **26**, 285–291.

3. Sheridan JA, Bickford D. 2011 Shrinking body size as an ecological response to climate change. *Nat. Clim. Change* **1**, 401.

4. Roulin A. 2014 Melanin-based colour polymorphism responding to climate change. *Glob. Change Biol.* **20**, 3344–3350.

5. MacLean HJ, Kingsolver JG, Buckley LB. 2016 Historical changes in thermoregulatory traits of alpine butterflies reveal complex ecological and evolutionary responses to recent climate change. *Clim. Change Responses* **3**, 13.

6. Ellers J, Boggs CL. 2004 Evolutionary genetics of dorsal wing colour in Colias butterflies. *J. Evol. Biol.* **17**, 752.

7. Buckley LB, Kingsolver JG. 2012 The demographic impacts of shifts in climate means and extremes on alpine butterflies. *Funct. Ecol.* **26**, 969–977.

8. Kingsolver JG, Buckley LB. 2015 Climate variability slows evolutionary responses of Colias butterflies to recent climate change. *Proc. R. Soc. B Biol. Sci.* **282**, 20142470.

9. Stamberger JA. 2006 *Adaptation to temporal scales of heterogeneity in the thermal environment*. Dissertation. Stanford University.

10. Watt WB. 1968 Adaptive significance of pigment polymorphisms in Colias butterflies. I. Variation of melanin pigment in relation to thermoregulation. *Evolution* **22**, 437–458.

11. Kingsolver JG. 1983 Thermoregulation and Flight in Colias Butterflies - Elevational Patterns and Mechanistic Limitations . *Ecology* **64**, 534–545.

12. Bivand R. 2005 *The Spdep package*. Comprehensive R Archive Network, Version 0.3-13.

13. Kissling WD, Carl G. 2008 Spatial autocorrelation and the selection of simultaneous autoregressive models. *Glob. Ecol. Biogeogr.* **17**, 59–71.

14. Millien V, Ledevin R, Boué C, Gonzalez A. 2017 Rapid morphological divergence in two closely related and co-occurring species over the last 50 years. *Evol. Ecol.* **31**, 847–864.

15. Holmes MW, Boykins GK, Bowie RC, Lacey EA. 2016 Cranial morphological variation in Peromyscus maniculatus over nearly a century of environmental change in three areas of California. *J. Morphol.* **277**, 96–106.

16. Walsh RE, Assis A, Paula A, Patton JL, Marroig G, Dawson TE, Lacey EA. 2016 Morphological and dietary responses of chipmunks to a century of climate change. *Glob. Change Biol.* **22**, 3233–3252.

17. Assis APA, Patton JL, Hubbe A, Marroig G. 2016 Directional selection effects on patterns of phenotypic (co) variation in wild populations. In *Proc. R. Soc. B*, p. 20161615.

18. Pergams OR, Lawler JJ. 2009 Recent and widespread rapid morphological change in rodents. *PloS One* **4**, e6452.

19. Tomassini A, Colangelo P, Agnelli P, Jones G, Russo D. 2014 Cranial size has increased over 133 years in a common bat, Pipistrellus kuhlii: a response to changing climate or urbanization? *J. Biogeogr.* **41**, 944–953.

20. LaBarbera K, Hayes KR, Marsh KJ, Lacey EA. 2017 Complex relationships among environmental conditions and bill morphology in a generalist songbird. *Evol. Ecol.* **31**, 707–724.

21. Campbell-Tennant DJ, Gardner JL, Kearney MR, Symonds MR. 2015 Climate-related spatial and temporal variation in bill morphology over the past century in Australian parrots. *J. Biogeogr.* **42**, 1163–1175.

22. Babin-Fenske J, Anand M, Alarie Y. 2008 Rapid morphological change in stream beetle museum specimens correlates with climate change. *Ecol. Entomol.* **33**, 646–651.

23. Anderson SJ, Conrad KF, Gillman MP, Woiwod IP, Freeland JR. 2008 Phenotypic changes and reduced genetic diversity have accompanied the rapid decline of the garden tiger moth (Arctia caja) in the UK. *Ecol. Entomol.* **33**, 638–645.

24. Salewski V, Siebenrock K-H, Hochachka WM, Woog F, Fiedler W. 2014 Morphological change to birds over 120 years is not explained by thermal adaptation to climate change. *PloS One* **9**, e101927.
